# Supplementary material for: Assessing infection control practices to protect health care workers and patients in Malawi from nosocomial transmission of Mycobacterium tuberculosis
Source: PubMed Central journal article supplement (PMC5718482; doi:10.1371/journal.pone.0189140), 2017-12-06
Supplement: pone.0189140.s001.pdf [file pone.0189140.s001.pdf]

Date: \_\_\_/\_\_\_/\_\_\_

Site: \_\_\_\_\_

#2-\_\_\_\_\_

**Tingathe Infection Prevention and Control Survey**

Thank you for offering to share your thoughts. Your voluntary feedback will remain **anonymous** and is important to strengthen infection control practices that protect you, your colleagues, and your patients. Surveys will be totaled by site for reporting purposes and to identify areas for improvement.

**This is NOT an assessment of individual performance.**

*If you have feedback, questions, or concerns for the study team, please contact your Tingathe mentor.*

|   |                                                      |                                                                                                                                                                                                                                                                                                                                                                                                                                                                                      |  |
|---|------------------------------------------------------|--------------------------------------------------------------------------------------------------------------------------------------------------------------------------------------------------------------------------------------------------------------------------------------------------------------------------------------------------------------------------------------------------------------------------------------------------------------------------------------|--|
| 1 | What is your age?                                    |                                                                                                                                                                                                                                                                                                                                                                                                                                                                                      |  |
| 2 | What is your gender?                                 | <input type="checkbox"/> Male <input type="checkbox"/> Female <input type="checkbox"/> Prefer not to say                                                                                                                                                                                                                                                                                                                                                                             |  |
| 3 | What is your position?<br>(Check all that apply)     | <input type="checkbox"/> Nurse <input type="checkbox"/> Clinical officer <input type="checkbox"/> Manager <input type="checkbox"/> Clerk<br><input type="checkbox"/> Student <input type="checkbox"/> Tingathe CHW <input type="checkbox"/> Medical doctor <input type="checkbox"/> HSA<br><input type="checkbox"/> Other: _____ <input type="checkbox"/> Medical assistant <input type="checkbox"/> Prefer not to say <input type="checkbox"/> Cleaner <input type="checkbox"/> EHO |  |
| 4 | How many years have you been working in health care? |                                                                                                                                                                                                                                                                                                                                                                                                                                                                                      |  |

| Please check one box best describing your level of agreement with each statement<br>At my facility... |                                                                                                   | Strongly disagree | Disagree | Neutral | Agree | Strongly agree |
|-------------------------------------------------------------------------------------------------------|---------------------------------------------------------------------------------------------------|-------------------|----------|---------|-------|----------------|
| 5                                                                                                     | I have access to confidential HTC                                                                 |                   |          |         |       |                |
| 6                                                                                                     | Health care workers eligible for <b>antiretroviral therapy (ART)</b> have access to it            |                   |          |         |       |                |
| 7                                                                                                     | Health care workers eligible for <b>isoniazid preventive therapy (IPT)</b> have access to it      |                   |          |         |       |                |
| 8                                                                                                     | I have access to an N95 face mask if I want one                                                   |                   |          |         |       |                |
| 9                                                                                                     | Surgical masks are routinely offered to patients with a cough                                     |                   |          |         |       |                |
| 10                                                                                                    | All patients accessing care are screened for cough                                                |                   |          |         |       |                |
| 11                                                                                                    | All patients accessing care are educated about cough hygiene                                      |                   |          |         |       |                |
| 12                                                                                                    | Hospitalized TB patients are encouraged to spend daylight hours outside                           |                   |          |         |       |                |
| 13                                                                                                    | Windows are kept open when possible to maximize ventilation                                       |                   |          |         |       |                |
| 14                                                                                                    | There is someone responsible for infection control I can talk to with questions or concerns       |                   |          |         |       |                |
| 15                                                                                                    | The physical layout of this facility makes me worried about getting TB from my patients           |                   |          |         |       |                |
| 16                                                                                                    | Patients don't always get the services they need because providers are concerned about getting TB |                   |          |         |       |                |

|      |                                                                                                                                                                                                                                                                                                                                                                                                                                                                                                                                                                                                                                            |                                                                                                                                             |
|------|--------------------------------------------------------------------------------------------------------------------------------------------------------------------------------------------------------------------------------------------------------------------------------------------------------------------------------------------------------------------------------------------------------------------------------------------------------------------------------------------------------------------------------------------------------------------------------------------------------------------------------------------|---------------------------------------------------------------------------------------------------------------------------------------------|
| 17   | I know my HIV status                                                                                                                                                                                                                                                                                                                                                                                                                                                                                                                                                                                                                       | <input type="checkbox"/> Yes <input type="checkbox"/> No <input type="checkbox"/> Prefer not to say                                         |
| 18   | I've received an HIV test at the same facility where I work                                                                                                                                                                                                                                                                                                                                                                                                                                                                                                                                                                                | <input type="checkbox"/> Yes <input type="checkbox"/> No <input type="checkbox"/> Prefer not to say                                         |
| 19   | I've been treated for TB before                                                                                                                                                                                                                                                                                                                                                                                                                                                                                                                                                                                                            | <input type="checkbox"/> Yes <input type="checkbox"/> No <input type="checkbox"/> Prefer not to say                                         |
| 20   | I've been treated for TB since I started working in health care                                                                                                                                                                                                                                                                                                                                                                                                                                                                                                                                                                            | <input type="checkbox"/> Yes <input type="checkbox"/> No <input type="checkbox"/> Prefer not to say                                         |
| 20.1 | ↳ If yes: I received treatment at the facility where I work                                                                                                                                                                                                                                                                                                                                                                                                                                                                                                                                                                                | <input type="checkbox"/> Yes <input type="checkbox"/> No <input type="checkbox"/> Prefer not to say <input type="checkbox"/> Not applicable |
| 21   | I'm currently on TB treatment                                                                                                                                                                                                                                                                                                                                                                                                                                                                                                                                                                                                              | <input type="checkbox"/> Yes <input type="checkbox"/> No <input type="checkbox"/> Prefer not to say                                         |
| 22   | I'm currently on IPT                                                                                                                                                                                                                                                                                                                                                                                                                                                                                                                                                                                                                       | <input type="checkbox"/> Yes <input type="checkbox"/> No <input type="checkbox"/> Prefer not to say                                         |
| 23   | I would feel comfortable receiving <b>TB treatment</b> at the facility where I work                                                                                                                                                                                                                                                                                                                                                                                                                                                                                                                                                        | <input type="checkbox"/> Yes <input type="checkbox"/> No <input type="checkbox"/> Prefer not to say                                         |
| 24   | I would feel comfortable receiving <b>ART</b> at the facility where I work                                                                                                                                                                                                                                                                                                                                                                                                                                                                                                                                                                 | <input type="checkbox"/> Yes <input type="checkbox"/> No <input type="checkbox"/> Prefer not to say                                         |
| 25   | Have you ever been screened for TB?                                                                                                                                                                                                                                                                                                                                                                                                                                                                                                                                                                                                        | <input type="checkbox"/> Yes <input type="checkbox"/> No <input type="checkbox"/> Prefer not to say                                         |
| 26   | When were you last screened for TB? (mm/yy)                                                                                                                                                                                                                                                                                                                                                                                                                                                                                                                                                                                                | ____/____ <input type="checkbox"/> Never <input type="checkbox"/> Don't remember                                                            |
| 27   | Have you ever been taught about infection control?                                                                                                                                                                                                                                                                                                                                                                                                                                                                                                                                                                                         | <input type="checkbox"/> Yes <input type="checkbox"/> No <input type="checkbox"/> Prefer not to say                                         |
| 28   | When was the last time you were taught about infection control? (mm/yy)                                                                                                                                                                                                                                                                                                                                                                                                                                                                                                                                                                    | ____/____ <input type="checkbox"/> Never <input type="checkbox"/> Don't remember                                                            |
| 29   | What are the four most common signs and symptoms of active TB disease in adults?                                                                                                                                                                                                                                                                                                                                                                                                                                                                                                                                                           | 1. _____ 2. _____<br>3. _____ 4. _____                                                                                                      |
| 30   | In the next year, what do you think your risk is of becoming infected with TB? (Please choose one answer)                                                                                                                                                                                                                                                                                                                                                                                                                                                                                                                                  |                                                                                                                                             |
|      | <p style="text-align: center;"> <span style="margin-right: 100px;">0%</span> <span style="margin-right: 100px;">25%</span> <span style="margin-right: 100px;">50%</span> <span style="margin-right: 100px;">75%</span> <span>100%</span> </p> <p style="text-align: center;"> <input type="checkbox"/> ————— <input type="checkbox"/> ————— <input type="checkbox"/> ————— <input type="checkbox"/> ————— <input type="checkbox"/> </p> <p style="text-align: center;"> <i>Definitely won't get TB</i>      <i>Probably won't get TB</i>      <i>Might get TB</i>      <i>Probably will get TB</i>      <i>Definitely will get TB</i> </p> |                                                                                                                                             |

This concludes the survey. Thank you very much for your participation.
