# Supplementary material for: Assessing infection control practices to protect health care workers and patients in Malawi from nosocomial transmission of Mycobacterium tuberculosis
Source: PubMed Central journal article supplement (PMC5718482; doi:10.1371/journal.pone.0189140), 2017-12-06
Supplement: pone.0189140.s002.pdf [file pone.0189140.s002.pdf]

## Tingathe TB - Infection Control Survey of Facility Managers

Date (dd/mm/yy): \_\_\_/\_\_\_/\_\_\_

Site: \_\_\_\_\_

#:1- \_\_\_\_\_

Respondent name: \_\_\_\_\_

Dept: \_\_\_\_\_

Length of time as manager: \_\_\_\_\_ yrs

Age: \_\_\_\_\_ Title: \_\_\_\_\_

Name of person filling form: \_\_\_\_\_

v9, 8/9/14

### Section I - Administrative controls

| #   | Question                                                                                                                        | Written Response                                                                                                                                                                                                                                                                                                                                                                                                                                                                    | Jump to |
|-----|---------------------------------------------------------------------------------------------------------------------------------|-------------------------------------------------------------------------------------------------------------------------------------------------------------------------------------------------------------------------------------------------------------------------------------------------------------------------------------------------------------------------------------------------------------------------------------------------------------------------------------|---------|
| 1   | Does your facility conduct patient education sessions?                                                                          | <input type="checkbox"/> No-----<br><input type="checkbox"/> Yes                                                                                                                                                                                                                                                                                                                                                                                                                    | →Q2     |
| 1.1 | What topics are covered with respect to TB?<br><i>(Check all that apply)</i>                                                    | <input type="checkbox"/> Cough hygiene<br><input type="checkbox"/> TB transmission/prevention-----<br><input type="checkbox"/> HIV & TB<br><input type="checkbox"/> TB diagnosis<br><input type="checkbox"/> Symptoms of TB<br><input type="checkbox"/> Treatment of TB<br><input type="checkbox"/> None of the above<br><input type="checkbox"/> Other: _____                                                                                                                      | →probe  |
| 1.2 | Who is targeted for patient education?<br><i>(Check all that apply)</i>                                                         | <input type="checkbox"/> Patients accessing TB services<br><input type="checkbox"/> Patients accessing HIV services<br><input type="checkbox"/> Patients accessing NRU services<br><input type="checkbox"/> Everyone entering facility<br><input type="checkbox"/> TB suspects<br><input type="checkbox"/> None of the above<br><input type="checkbox"/> Other: _____                                                                                                               |         |
| 2   | When patients come to the OPD, how do you decide who to see first?<br><i>(Check all that apply)</i>                             | <input type="checkbox"/> No prioritization<br><input type="checkbox"/> Critically ill patients<br><input type="checkbox"/> All patients with cough<br><input type="checkbox"/> All TB suspects<br><input type="checkbox"/> Other: _____                                                                                                                                                                                                                                             |         |
| 3   | What preventive measures are in place for patients with a cough <b>suspected of having TB?</b><br><i>(Check all that apply)</i> | <input type="checkbox"/> Masks/tissues offered to patients<br><input type="checkbox"/> Face masks for health care workers (generic)<br><input type="checkbox"/> Face masks for health care workers (N-95)<br><input type="checkbox"/> Triage and isolation<br><input type="checkbox"/> Cough etiquette education<br><input type="checkbox"/> None of the above                                                                                                                      |         |
| 4   | What preventive measures are in place for hospitalized patients <b>receiving TB treatment?</b><br><i>(Check all that apply)</i> | <input type="checkbox"/> Masks/tissues offered to patients<br><input type="checkbox"/> Face masks for health care workers<br><input type="checkbox"/> Triage and isolation<br><input type="checkbox"/> Placed in part of ward with good ventilation<br><input type="checkbox"/> Encouraged to spend daylight hours outside<br><input type="checkbox"/> None of the above<br><input type="checkbox"/> Other: _____<br><input type="checkbox"/> No hospitalized patients at site----- | →Q7     |
| 5   | Is there a policy addressing visitor's access to hospitalized patients being treated for TB?                                    | <input type="checkbox"/> No policy minimizing visitors<br><input type="checkbox"/> Policy minimizing visitors                                                                                                                                                                                                                                                                                                                                                                       |         |

|                                  |                                                                                                                  |                                                                                                                                                                                                                                                                                                                  |      |
|----------------------------------|------------------------------------------------------------------------------------------------------------------|------------------------------------------------------------------------------------------------------------------------------------------------------------------------------------------------------------------------------------------------------------------------------------------------------------------|------|
| 5.1                              | What groups are specifically restricted from entering TB ward?<br><i>(Check all that apply)</i>                  | <input type="checkbox"/> Children <5 years<br><input type="checkbox"/> Pregnant women<br><input type="checkbox"/> No groups restricted<br><input type="checkbox"/> Other: _____                                                                                                                                  |      |
| 6                                | Is there a policy outlining where health care workers living with HIV should or should not work?                 | <input type="checkbox"/> No<br><input type="checkbox"/> Yes, isolates HIV+ health care workers from TB suspects/patients<br><input type="checkbox"/> Yes, but doesn't isolate HIV+ health care workers                                                                                                           |      |
| 7                                | Are there standard operating procedures for infection prevention and control?                                    | <input type="checkbox"/> No<br><input type="checkbox"/> Yes                                                                                                                                                                                                                                                      |      |
| 8                                | Is there an infection control committee?                                                                         | <input type="checkbox"/> No-----<br><input type="checkbox"/> Yes                                                                                                                                                                                                                                                 | →Q10 |
| 8.1                              | Is there a point person assigned for this committee?                                                             | <input type="checkbox"/> No<br><input type="checkbox"/> Yes                                                                                                                                                                                                                                                      |      |
| 8.2                              | Name:                                                                                                            |                                                                                                                                                                                                                                                                                                                  |      |
| 8.3                              | Cadre:                                                                                                           |                                                                                                                                                                                                                                                                                                                  |      |
| 8.4                              | Contact:                                                                                                         |                                                                                                                                                                                                                                                                                                                  |      |
| <b>Section II - Case finding</b> |                                                                                                                  |                                                                                                                                                                                                                                                                                                                  |      |
| 9                                | Is active symptom screening conducted for TB?                                                                    | <input type="checkbox"/> No-----<br><input type="checkbox"/> Yes                                                                                                                                                                                                                                                 | →Q11 |
| 9.1                              | Where is symptom screening conducted for TB?<br><i>(Check all that apply)</i>                                    | <input type="checkbox"/> ART/HCC<br><input type="checkbox"/> ANC<br><input type="checkbox"/> Malnutrition<br><input type="checkbox"/> General inpatient wards<br><input type="checkbox"/> OPD<br><input type="checkbox"/> HTC<br><input type="checkbox"/> Public Health<br><input type="checkbox"/> Other: _____ |      |
| 9.2                              | Which groups of people coming to this facility get screened for symptoms of TB?<br><i>(Check all that apply)</i> | <input type="checkbox"/> Patients<br><input type="checkbox"/> Clients<br><input type="checkbox"/> Guardians                                                                                                                                                                                                      |      |
| 9.3                              | What questions are asked to screen <b>adults</b> for TB?<br><i>(Check all that apply)</i>                        | <input type="checkbox"/> Cough<br><input type="checkbox"/> Fever<br><input type="checkbox"/> Weight loss<br><input type="checkbox"/> Night sweats<br><br><input type="checkbox"/> Other: _____<br><br><input type="checkbox"/> Other: _____                                                                      |      |

|                                             |                                                                                               |                                                                                                                                                                                                                                                                                                                                                                                                                                                                                                                                                                                                               |  |
|---------------------------------------------|-----------------------------------------------------------------------------------------------|---------------------------------------------------------------------------------------------------------------------------------------------------------------------------------------------------------------------------------------------------------------------------------------------------------------------------------------------------------------------------------------------------------------------------------------------------------------------------------------------------------------------------------------------------------------------------------------------------------------|--|
| 9.4                                         | What questions are asked to screen <b>children</b> for TB?<br><i>(Check all that apply)</i>   | <input type="checkbox"/> Cough<br><input type="checkbox"/> Fever<br><input type="checkbox"/> Poor weight gain/failure to thrive<br><input type="checkbox"/> Home TB contact<br><br><input type="checkbox"/> Other: _____<br><br><input type="checkbox"/> Other: _____                                                                                                                                                                                                                                                                                                                                         |  |
| 9.5                                         | How many patients have been screened for symptoms of TB in the last month?                    |                                                                                                                                                                                                                                                                                                                                                                                                                                                                                                                                                                                                               |  |
| 9.6                                         | How many patients have screened positive for symptoms of TB in the last month?                |                                                                                                                                                                                                                                                                                                                                                                                                                                                                                                                                                                                                               |  |
| 10                                          | What diagnostics are routinely used to evaluate TB suspects?<br><i>(Check all that apply)</i> | <input type="checkbox"/> Sputum smear-----→ <input type="checkbox"/> At this facility <input type="checkbox"/> Sent to another facility<br><input type="checkbox"/> GeneXpert-----→ <input type="checkbox"/> At this facility <input type="checkbox"/> Sent to another facility<br><input type="checkbox"/> Culture-----→ <input type="checkbox"/> At this facility <input type="checkbox"/> Sent to another facility<br><input type="checkbox"/> Chest X-Ray-----→ <input type="checkbox"/> At this facility <input type="checkbox"/> Sent to another facility<br><input type="checkbox"/> None of the above |  |
| 11                                          | Is there a policy for regular screening of health care workers for TB?                        | <input type="checkbox"/> No<br><input type="checkbox"/> Yes                                                                                                                                                                                                                                                                                                                                                                                                                                                                                                                                                   |  |
| 12                                          | How many health care workers have been treated for active TB in the last year?                |                                                                                                                                                                                                                                                                                                                                                                                                                                                                                                                                                                                                               |  |
| <b>Section III - Environmental Controls</b> |                                                                                               |                                                                                                                                                                                                                                                                                                                                                                                                                                                                                                                                                                                                               |  |
| 13                                          | Are there single-patient isolation rooms?                                                     | <input type="checkbox"/> No<br><input type="checkbox"/> Yes                                                                                                                                                                                                                                                                                                                                                                                                                                                                                                                                                   |  |
| 14                                          | Are fans in place and routinely used?                                                         | <input type="checkbox"/> No<br><input type="checkbox"/> Yes                                                                                                                                                                                                                                                                                                                                                                                                                                                                                                                                                   |  |
| 15                                          | Are UV lights in place and routinely used?                                                    | <input type="checkbox"/> No<br><input type="checkbox"/> Yes                                                                                                                                                                                                                                                                                                                                                                                                                                                                                                                                                   |  |
| 16                                          | Are air filters in place and routinely used?                                                  | <input type="checkbox"/> No<br><input type="checkbox"/> Yes                                                                                                                                                                                                                                                                                                                                                                                                                                                                                                                                                   |  |
| 17                                          | What policies are in place to maximize natural ventilation?                                   | <input type="checkbox"/> None/other<br><input type="checkbox"/> Windows/doors kept open                                                                                                                                                                                                                                                                                                                                                                                                                                                                                                                       |  |
