# Supplementary material for: Assessing infection control practices to protect health care workers and patients in Malawi from nosocomial transmission of Mycobacterium tuberculosis
Source: PubMed Central journal article supplement (PMC5718482; doi:10.1371/journal.pone.0189140), 2017-12-06
Supplement: pone.0189140.s003.pdf [file pone.0189140.s003.pdf]

# Tingathe TB - Infection Control Observations

## Section I - Administrative controls

Date (dd/mm/yy): \_\_\_/\_\_\_/\_\_\_ Site: \_\_\_\_\_

#3- \_\_\_\_\_

Name of person filling form: \_\_\_\_\_

v06 8/9/14

| # | Question                                                                                         | Written Response                                                                                                                                                                               |
|---|--------------------------------------------------------------------------------------------------|------------------------------------------------------------------------------------------------------------------------------------------------------------------------------------------------|
| 1 | UV lights observed and switched on                                                               | <input type="checkbox"/> No<br><input type="checkbox"/> Yes                                                                                                                                    |
| 2 | Filtration units observed and switched on                                                        | <input type="checkbox"/> No<br><input type="checkbox"/> Yes                                                                                                                                    |
| 3 | Fans observed and switched on                                                                    | <input type="checkbox"/> No<br><input type="checkbox"/> Yes                                                                                                                                    |
| 4 | At ART clinic, were the windows open?                                                            | <input type="checkbox"/> No windows open<br><input type="checkbox"/> Some windows open<br><input type="checkbox"/> All windows open                                                            |
| 5 | At the TB office, were the windows open?                                                         | <input type="checkbox"/> No windows open<br><input type="checkbox"/> Some windows open<br><input type="checkbox"/> All windows open                                                            |
| 6 | At malnutrition clinic, were the windows open?                                                   | <input type="checkbox"/> No windows open<br><input type="checkbox"/> Some windows open<br><input type="checkbox"/> All windows open<br><input type="checkbox"/> No malnutrition clinic at site |
| 7 | Copy of infection control standard operating procedures present in areas where patients are seen | <input type="checkbox"/> No<br><input type="checkbox"/> Yes                                                                                                                                    |
| 8 | Waiting area for HIV services physically separated from waiting area for TB patients             | <input type="checkbox"/> No<br><input type="checkbox"/> Yes                                                                                                                                    |
| 9 | Patients at ART/HCC observed wearing a mask                                                      | <input type="checkbox"/> No<br><input type="checkbox"/> Yes                                                                                                                                    |

**Comments:**
